# Supplementary material for: A quasi-solid-state rechargeable cell with high energy and superior safety enabled by stable redox chemistry of Li2S in gel electrolyte
Source: Royal Society of Chemistry journal article supplement (doi:10.1039/d0ee03037f), 2020-12-24
Supplement: d0ee03037f4.pdf [file d0ee03037f4.pdf]

# A quasi-solid-state rechargeable cell with high energy and superior safety enabled by stable redox chemistry of Li<sub>2</sub>S in gel electrolyte

Xiangyu Meng,<sup>a</sup> Yuzhao Liu,<sup>a</sup> Zhiyu Wang,<sup>a,\*</sup> Yizhou Zhang,<sup>a</sup> Xingyu Wang,<sup>a</sup> Jieshan Qiu<sup>b,\*</sup>

<sup>a</sup> State Key Lab of Fine Chemicals, Liaoning Key Lab for Energy Materials and Chemical Engineering, PSU-DUT Joint Center for Energy Research, Dalian University of Technology, Dalian 116024, China. Email: zywang@dlut.edu.cn

<sup>b</sup> College of Chemical Engineering, Beijing University of Chemical Technology, Beijing 100029, China. Email: jqiu@dlut.edu.cn

## Method

**Synthesis of Si-NP@MCNF anode.** Free-standing Si-NP@MCNF anodes were made in a similar way of electrospinning *h*-CoN@MCNF fabrics except to replace the Co(Ac)<sub>2</sub>·4H<sub>2</sub>O by commercial Si powder (0.36 g) with an average size of *ca.* 50 nm. The obtained fabrics were aged at 280 °C for 2 h in air and subsequently annealed at 800 °C for 2 h in H<sub>2</sub>/Ar flow to yield Si-NP@MCNF anode.

**Deposition behavior of Li<sub>2</sub>S.** The deposition behavior of Li<sub>2</sub>S on *h*-CoN@MCNF or MCNF was measured by a CHI760A electrochemical workstation in CR2016 coin cells. The *h*-CoN@MCNF or MCNF were used as the working electrode and Li foil was used as the counter/reference electrode. The Li<sub>2</sub>S<sub>8</sub> solution (0.25 M) was prepared by mixing the Li<sub>2</sub>S and sulfur with a molar ratio of 1 : 7 in 1.0 M LiTFSI in DOL/DME (1:1 by volume) under stirring at 50 °C for 24 h. A 25 μL Li<sub>2</sub>S<sub>8</sub> solution (0.25 M) was applied as catholyte, and the control electrolyte without Li<sub>2</sub>S<sub>8</sub> (20 μL) was used as anolyte. The assembled cells were firstly galvanostatically discharged at 0.10 mA to 2.06 V, and subsequently potentiostatically discharged at 2.05 V to fully convert the polysulfides to solid Li<sub>2</sub>S on the electrode until the current dropped below 10<sup>-5</sup> A.

**Visualized adsorption test.** The Li<sub>2</sub>S<sub>6</sub> solution (10 mM) was prepared by mixing sulfur and Li<sub>2</sub>S with a molar ratio of 5:1 in DOL/DME (1:1 by volume) via magnetically stirring at 50 °C for 24 h. The *h*-CoN@MCNF or MCNF with a similar surface area of *ca.* 2.0 m<sup>2</sup> were immersed into 4.0 mL of Li<sub>2</sub>S<sub>6</sub> solution for 12 h to assure throughout adsorption. Afterward, the supernatant solution was collected for analysis by a UV-vis spectrometer in a wavelength range of 300 - 650 nm.

**Symmetrical cell test.** The cells were fabricated by directly using *h*-CoN@MCNF or MCNF with a similar area and weight (*ca.* 2 mg cm<sup>-2</sup>) as both the working and counter electrodes. The

electrolyte is 1.0 M LiTFSI in DOL/DME (1:1 by volume, 50  $\mu$ L) containing 0.2 M Li<sub>2</sub>S<sub>6</sub>. Cyclic voltammetry (CV) studies were conducted using a CHI 660A electrochemical workstation between -1.0 to 1.0 V at different scan rates.

**Computational method.** Density functional theory (DFT) calculations were performed by the Vienna ab initio simulation package (VASP),<sup>1</sup> using the planewave basis set with an energy cutoff of 400 eV, the projector augmented wave (PAW) potentials,<sup>2</sup> and the GGA-PBE exchange-correlation functional.<sup>3</sup> Partial occupancies of the Kohn-Sham orbitals were allowed using the Gaussian smearing method and a width of 0.05 eV. The electronic energy was considered self-consistent when the energy change was smaller than 10<sup>-5</sup> eV. A geometry optimization was considered convergent when the force change was smaller than 0.02 eV/Å. Grimme's DFT-D3 methodology<sup>4</sup> was used to describe the dispersion interactions. The lattice constant of zincblende-type cubic CoN bulk unit cell is optimized, when using a 9  $\times$  9  $\times$  9 Monkhorst-Pack scheme *k*-point grid for Brillouin zone sampling, to be  $a = 4.220$  Å. Basing on this unit cell, five surface models were constructed as follows.

Co-terminated and N-terminated CoN (100) surface models were built with  $p(3\times 2)$  periodicity in the *x* and *y* directions and 1.5 stoichiometric layers (6 atomic layers) in the *z*-direction separated by vacuum in the depth of 15 Å to separate the surface slab from its periodic duplicates. Both models contain 36 Co and 36 N atoms. A CoN (110) surface model was built with  $p(3\times 2)$  periodicity in the *x* and *y* directions and 2 stoichiometric layers (4 atomic layers) in the *z*-direction separated by vacuum in the depth of 15 Å. It contains 48 Co and 48 N atoms. Co-terminated and N-terminated CoN (111) surface models were built with  $p(4\times 4)$  periodicity in the *x* and *y* directions and 3 stoichiometric layers (6 atomic layers) in the *z*-direction separated by vacuum in the depth of 15 Å. Both models contain 48 Co and 48 N atoms. During structural optimizations, the  $\Gamma$  point in the Brillouin zone was used for *k*-point sampling, and the top two atomic layers were allowed to relax while the bottom four were fixed.

The transition state of the elementary reaction step  $\text{Li}_2\text{S} \rightarrow \text{LiS} + \text{Li}$  was located by the nudged elastic band (NEB) method.<sup>5</sup> In the NEB method, the path between the reactant(s) and product(s) was discretized into a series of five structural images. The intermediate images were relaxed until the perpendicular forces were smaller than 0.02 eV/Å. The adsorption energy ( $E_{\text{ads}}$ ) of adsorbate A was defined as  $E_{\text{ads}} = E_{\text{A/surf}} - E_{\text{surf}} - E_{\text{A(g)}}$ , where  $E_{\text{A/surf}}$ ,  $E_{\text{surf}}$  and  $E_{\text{A(g)}}$  are the energy of adsorbate A adsorbed on the surface, the clean surface, and isolated A molecule in a cubic periodic box with a side length of 20 Å and a 1  $\times$  1  $\times$  1 Monkhorst-Pack *k*-point grid for Brillouin zone sampling, respectively.

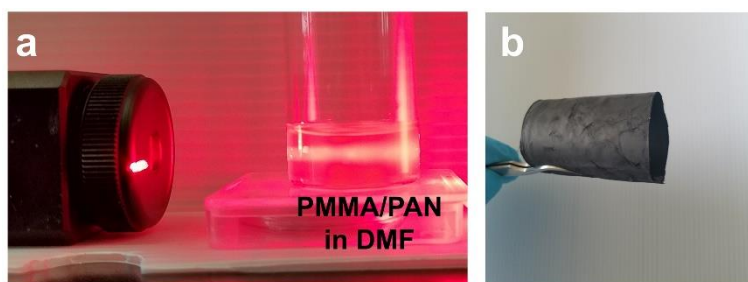

**Fig. S1.** (a) The Tyndall effect of PMMA/PAN in DMF solution. (b) Optical images of *h*-CoN@MCNF fabric.

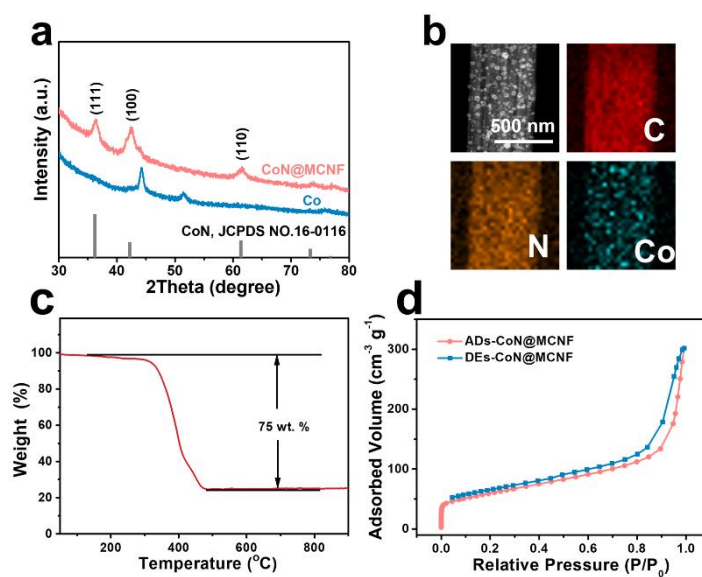

**Fig. S2.** (a) XRD pattern, (b) element mapping, (c) TGA curve measured in air at a ramp rate of 10 °C min<sup>-1</sup>, and (d) N<sub>2</sub> adsorption-desorption isotherms of *h*-CoN@MCNF fabrics.

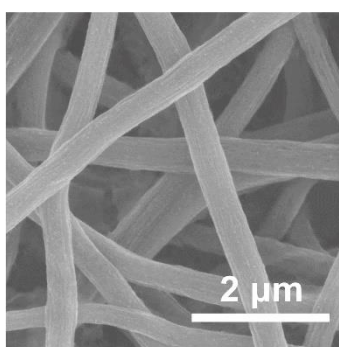

**Fig. S3.** SEM image of *h*-CoN@MCNF/Li<sub>2</sub>S cathode.

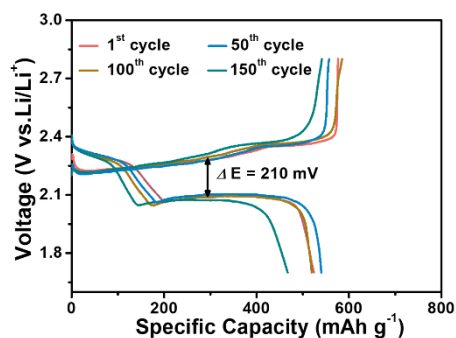

**Fig. S4.** Discharge-charge voltage profiles of MCNF/Li<sub>2</sub>S cathode for different cycles at 0.2 C.

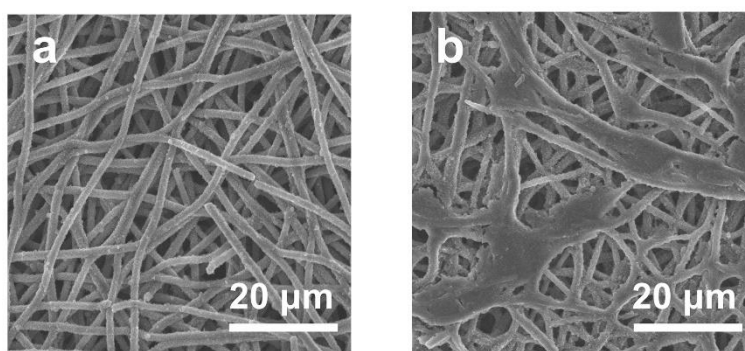

**Fig. S5.** SEM images of discharged (a) *h*-CoN@MCNF/Li<sub>2</sub>S cathode and (b) MCNF/Li<sub>2</sub>S cathode.

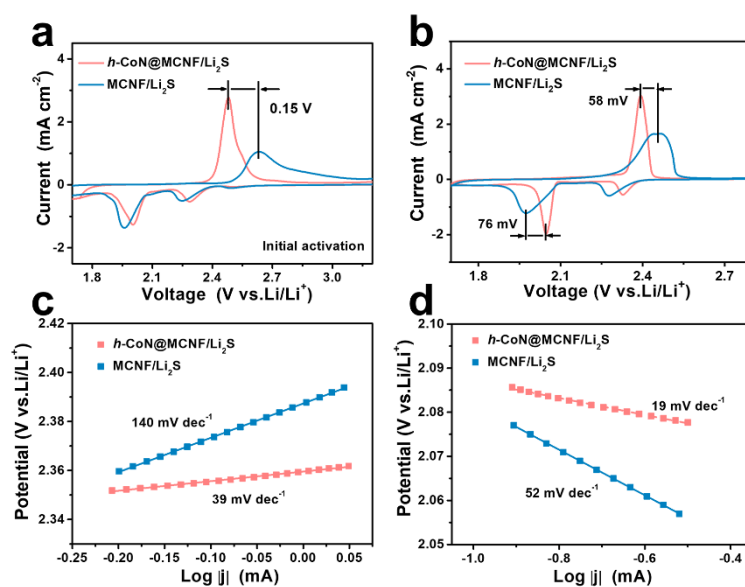

**Fig. S6.** CVs of *h*-CoN@MCNF/Li<sub>2</sub>S and MCNF/Li<sub>2</sub>S cathode upon (a) initial cycle between 1.7 and 3.2 V and (b) after initial cycle between 1.7 and 2.8 V at a scan rate of 0.1 mV s<sup>-1</sup>. Tafel plots derived from (c) oxidation and (d) reduction process of Li<sub>2</sub>S.

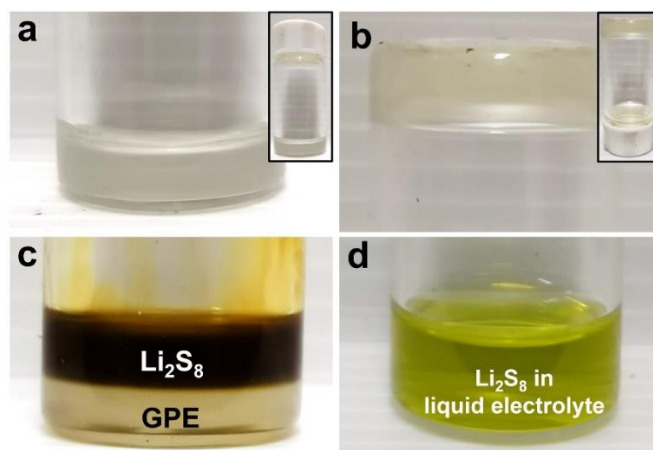

**Fig. S7.** Optical images of GPE in a glass vessel (a) before and (b) after turning upside down. Permeation capability of Li<sub>2</sub>S<sub>8</sub> in (c) GPE and (d) liquid electrolyte.

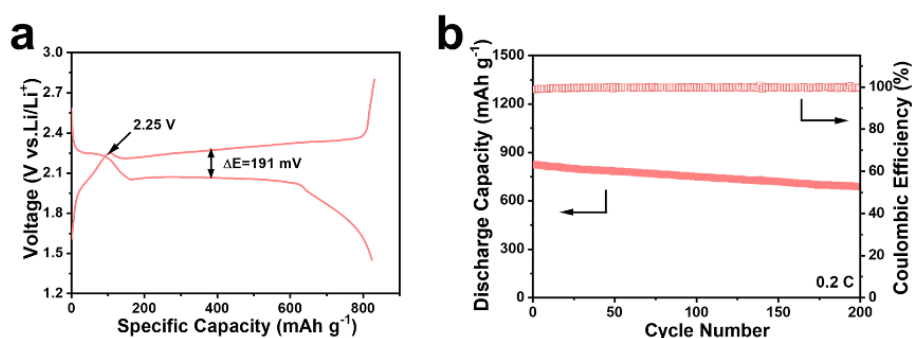

**Fig. S8.** (a) Typical discharge-charge voltage profiles and (b) cycling stability of *h*-CoN@MCNF/Li<sub>2</sub>S cathode in GPE at 0.2 C.

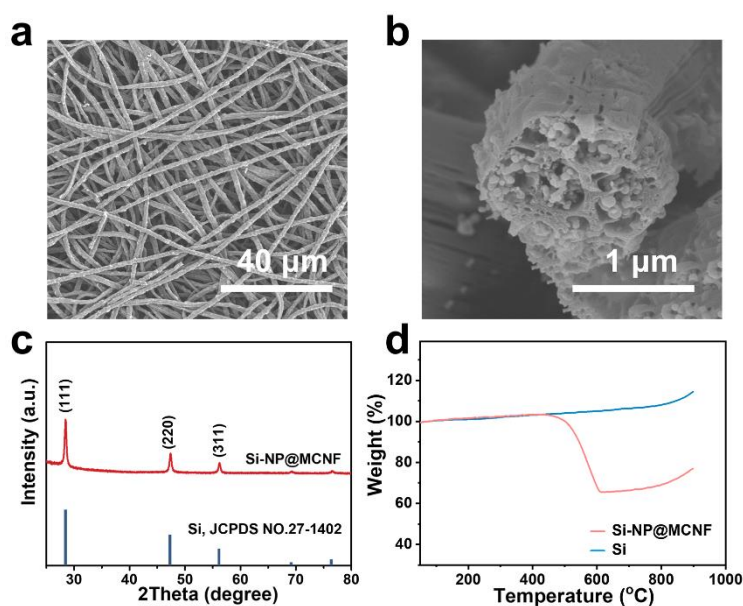

**Fig. S9.** (a) SEM image, (b) cross-section, (c) XRD pattern and (d) TGA curve of Si-NP@MCNF anode.

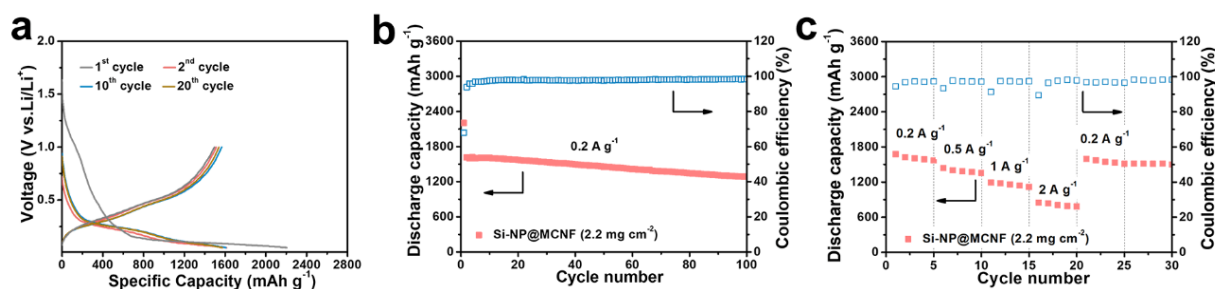

**Fig. S10.** (a) Discharge-charge curves, (b) cycling stability, and (c) rate performance of Si-NP@MCNF in half cells.

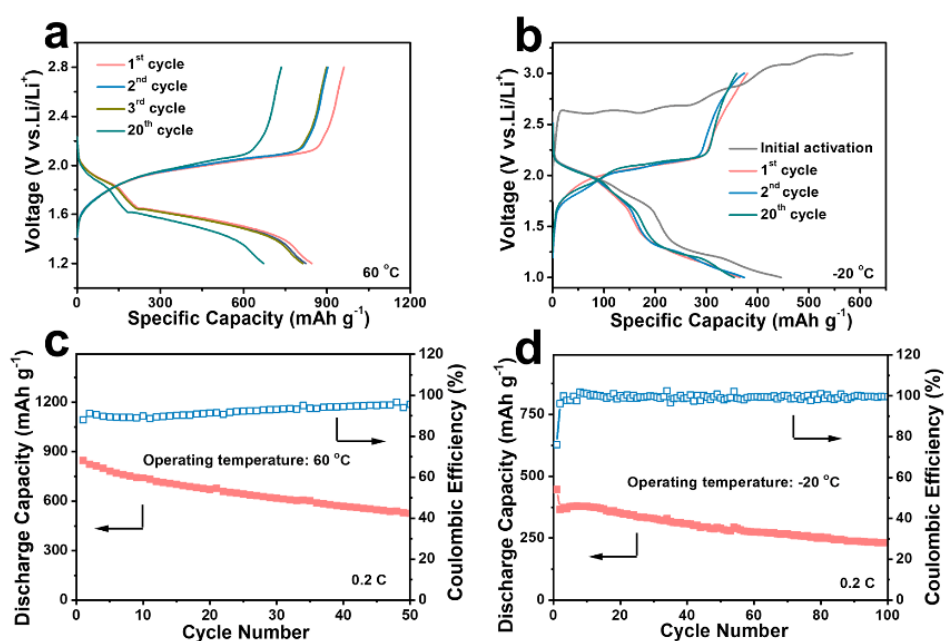

**Fig. S11.** Discharge-charge voltage profiles and cycling performance of quasi-solid-state  $\text{Li}_2\text{S}||\text{Si}$  full cells at (a, c)  $60^\circ\text{C}$  and (b, d)  $-20^\circ\text{C}$  at  $0.2\text{ C}$ .

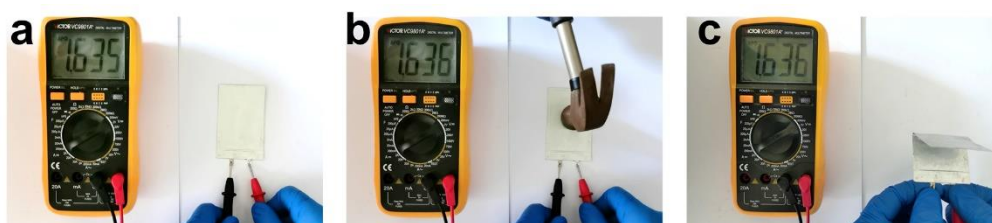

**Fig. S12.** OCV of quasi-solid-state  $\text{Li}_2\text{S}||\text{Si}$  full cells under (a) initial state, (b) mechanical impact and (c) bending state.

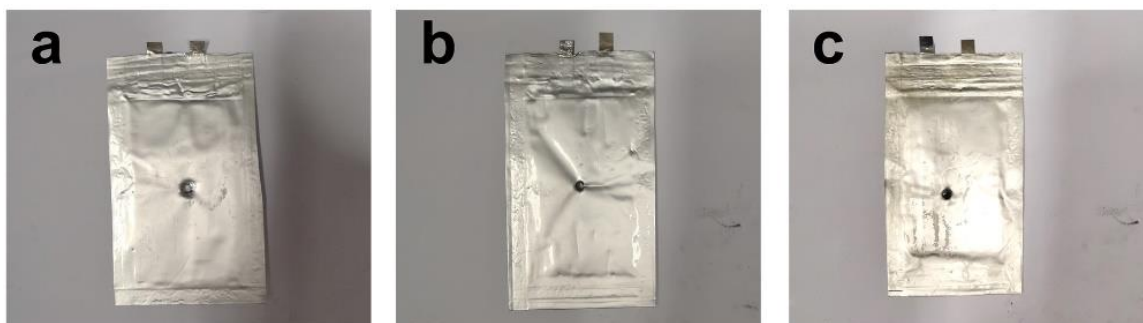

**Fig. S13.** Optical images of (a) a fresh  $\text{Li}_2\text{S}||\text{Si}$  full cell without initial charge, (b) a fully charged  $\text{Li}_2\text{S}||\text{Si}$  full cell and (c) a Li-S cell after nail penetration in air. Corresponding infrared thermography is shown in Fig. 5a.

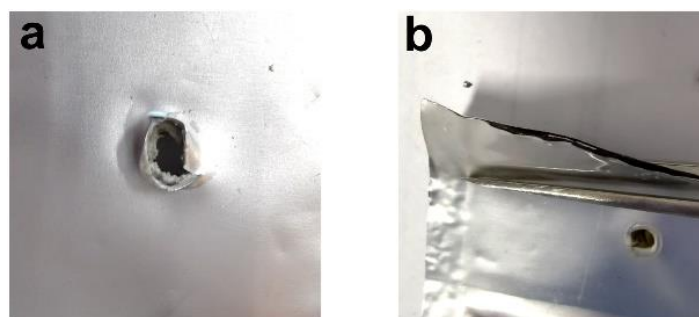

**Fig. S14.** Optical images of the broken regions on quasi-solid-state  $\text{Li}_2\text{S}||\text{Si}$  full cells.

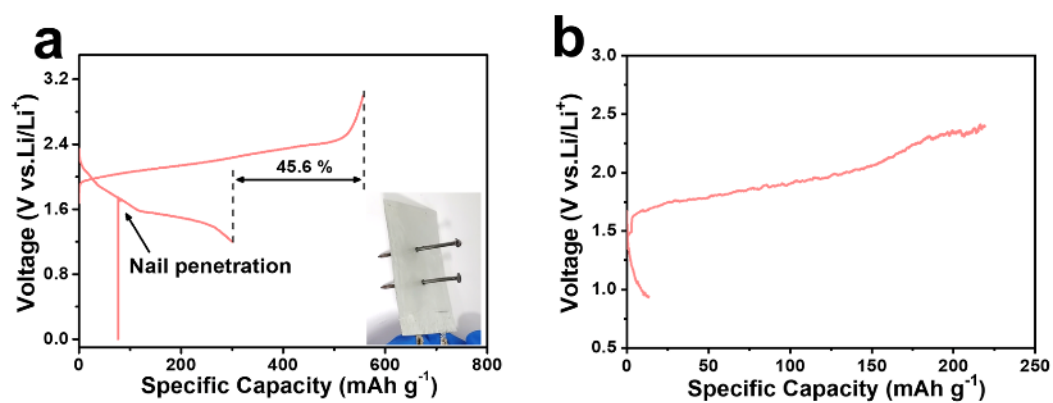

**Fig. S15.** (a) The charge-discharge curve of quasi-solid-state  $\text{Li}_2\text{S}||\text{Si}$  full cells after (a) nail penetration and (b) cutting half in air.

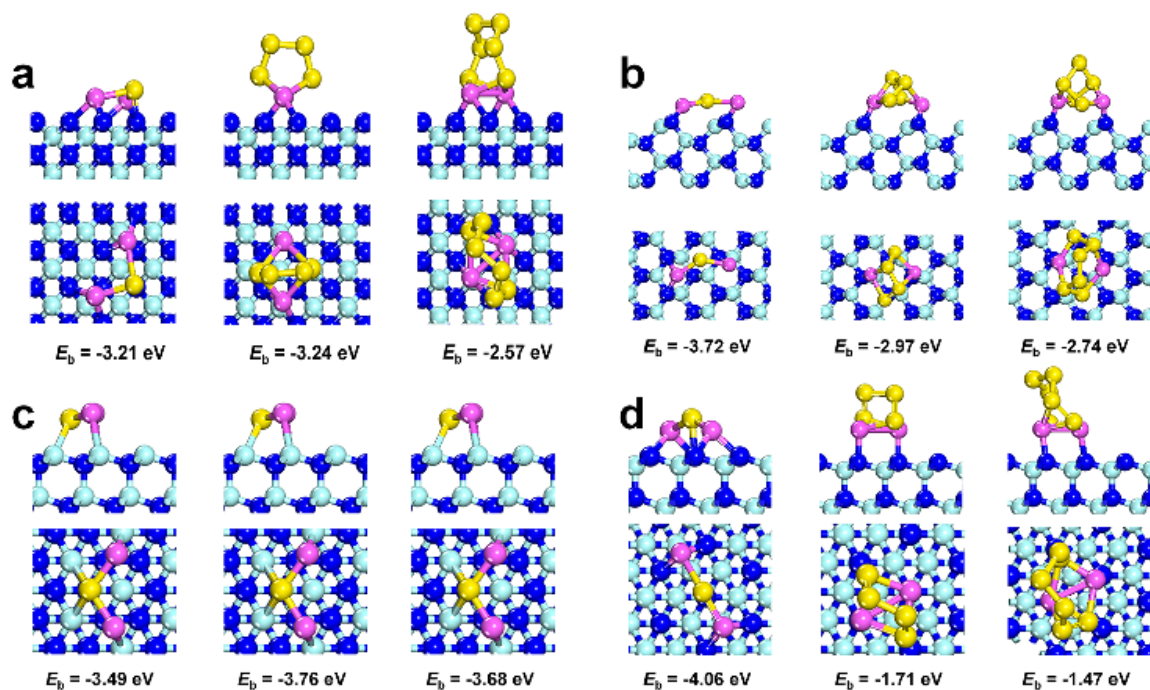

**Fig. S16.** Atomic structures of  $\text{Li}_2\text{S}$ ,  $\text{Li}_2\text{S}_4$  and  $\text{Li}_2\text{S}_6$  cluster adsorbed on (a) N-terminated CoN (100) facet; (b) CoN (110) facet; (c) Co-terminated CoN (111) facet, (d) N-terminated CoN (111) facet. The Co, N, Li, and S atoms are shown as spheres in cyan, blue, purple, and yellow, respectively.

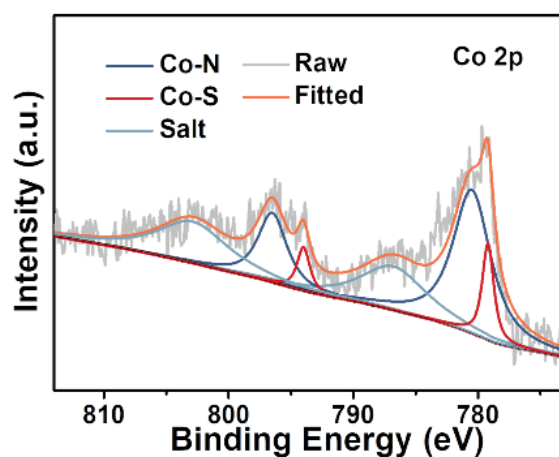

**Fig. S17.** Co 2p XPS spectrum of  $h\text{-CoN@MCNF/Li}_2\text{S}$  cathode after discharge.



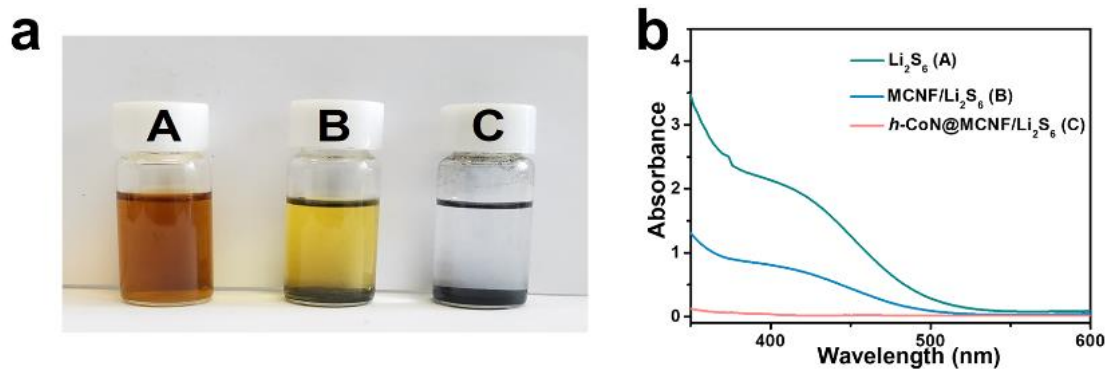

**Fig. S18.** (a) Optical image of Li<sub>2</sub>S<sub>6</sub> solution before and after exposure to *h*-CoN@MCNF or MCNF for 12 h. (b) UV-vis absorption spectra after the adsorption.

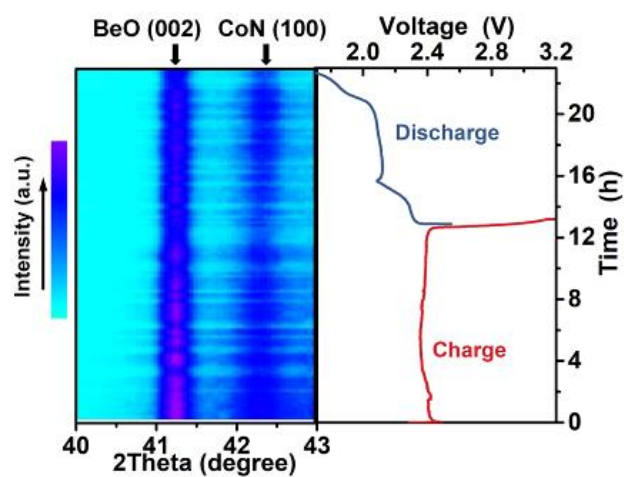

**Fig. S19.** *In-operando* XRD pattern of CoN in *h*-CoN@MCNF/Li<sub>2</sub>S cathode during cycling.

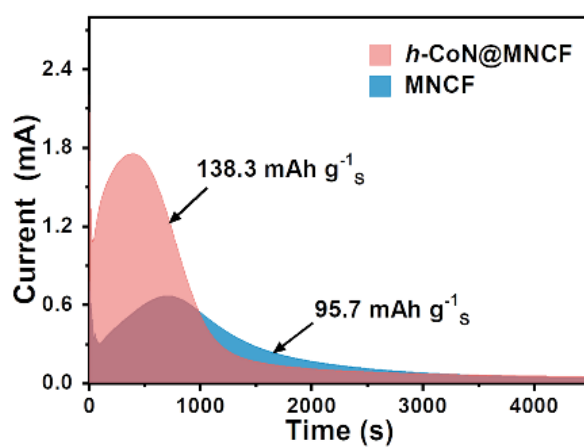

**Fig. S20.** Potentiostatic discharge profile of Li<sub>2</sub>S deposition on *h*-CoN@MCNF and MCNF electrodes at 2.05 V.

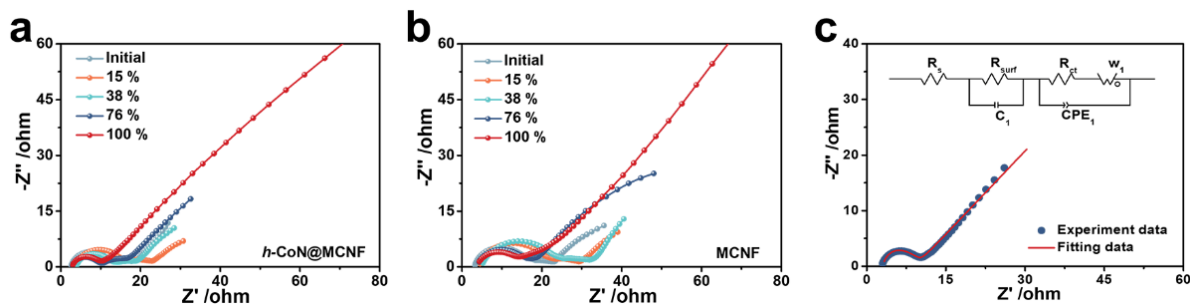

**Fig. S21.** *In-operando* Nyquist plots of (a) *h*-CoN@MCNF/Li<sub>2</sub>S and (b) MCNF/Li<sub>2</sub>S cathode at different discharge depth. (c) Fitting result of Nyquist plots of *h*-CoN@MCNF/Li<sub>2</sub>S cathode with 100 % discharge depth, wherein the inset is the equivalent circuit model.

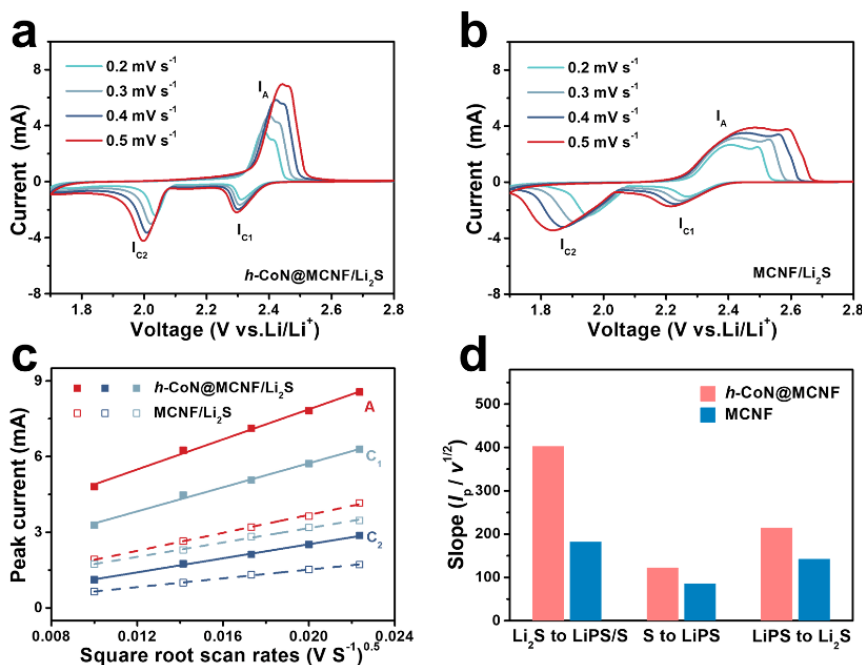

**Fig. S22.** CVs of (a) *h*-CoN@MCNF/Li<sub>2</sub>S and (b) MCNF/Li<sub>2</sub>S cathode in half cells at various scan rates from 0.2 to 0.5 mV s<sup>-1</sup> between 1.7 and 2.8 V. (c) Plot of CV peak current vs. the square root of scan rates and (d) derived value of  $I_p/v^{1/2}$  for charge and discharge process of *h*-CoN@MCNF/Li<sub>2</sub>S and MCNF/Li<sub>2</sub>S cathode.

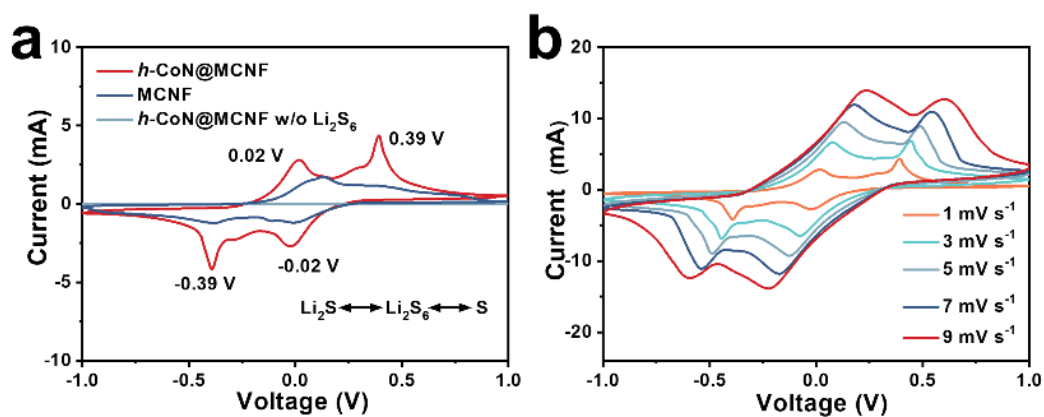

**Fig. S23.** CVs of the symmetric cells with *h*-CoN@MCNF or MCNF as both the working and counter electrodes, and 1.0 M LiTFSI-DOL/DME with or without 0.2 M Li<sub>2</sub>S<sub>6</sub> as the electrolyte at a scan rate of 1.0 mV s<sup>-1</sup> between -1.0 and 1.0 V. (b) CVs of the symmetric cells using identical *h*-CoN@MCNF electrodes at various scan rates.

**Table S1.** A comparison of CoN@MCNF/Li<sub>2</sub>S cathode with recently reported Li<sub>2</sub>S-based cathodes in electrochemical performance.

| Electrode                                | Mass loading (mg cm <sup>-2</sup> ) | Li <sub>2</sub> S content (wt.%) | Specific Capacity based on Li <sub>2</sub> S (mA h g <sup>-1</sup> ) | Cycle life | Capacity retention (%) | Activation voltage (V) | Reference        |
|------------------------------------------|-------------------------------------|----------------------------------|----------------------------------------------------------------------|------------|------------------------|------------------------|------------------|
| Li <sub>2</sub> S@LiTiO <sub>2</sub>     | 1.2                                 | 57.6                             | 732@0.5C                                                             | 400        | 88                     | 2.76                   | 6                |
| Li <sub>2</sub> S@TiS <sub>2</sub>       | 1.0                                 | 51.0                             | 666@0.5C                                                             | 400        | 77                     | 3.00                   | 7                |
| Li <sub>2</sub> S@ZnS                    | 2.0                                 | 62.6                             | 832@0.2 C                                                            | 100        | 77                     | 2.87                   | 8                |
| Li <sub>2</sub> S@graphene               | 1.2                                 | 42.0                             | 750@0.2C                                                             | 100        | 37                     | 2.85                   | 9                |
| Li <sub>2</sub> S@graphene               | 10.0                                | 79.6                             | 533@0.1C                                                             | 200        | 54                     | 2.74                   | 10               |
| Li <sub>2</sub> S@N,P-C                  | 2.0                                 | 62.0                             | 1000@0.1C                                                            | 100        | 70                     | 2.65                   | 11               |
| Li <sub>2</sub> S@C                      | 1.5                                 | 58.7                             | 972@0.2C                                                             | 100        | 79                     | 2.80                   | 12               |
| Li <sub>2</sub> S@TiN                    | 2.5                                 | --                               | 789@0.2C                                                             | 100        | 84                     | 2.87                   | 13               |
| Li <sub>2</sub> S@Mo                     | 2.9                                 | 25.9                             | 618@0.5 C                                                            | 500        | 62                     | 2.57                   | 14               |
| <b><i>h</i>-CoN@MCNF/Li<sub>2</sub>S</b> | <b>2.5</b>                          | <b>65.0</b>                      | <b>820@0.2 C</b>                                                     | <b>200</b> | <b>97.6</b>            | <b>2.43</b>            | <b>This work</b> |

**Table S2.** A comparison of Li<sub>2</sub>S-based full cells developed in this work and literature in electrochemical performance.

| Battery system                                                 | Current rate (C) | Cycle life | Li <sub>2</sub> S loading (mg cm <sup>-2</sup> ) | Specific energy based on active mass (W h Kg <sup>-1</sup> ) | Specific energy based on electrode weight (W h Kg <sup>-1</sup> ) | Reference        |
|----------------------------------------------------------------|------------------|------------|--------------------------------------------------|--------------------------------------------------------------|-------------------------------------------------------------------|------------------|
| Li <sub>2</sub> S-PAN  Si                                      | 0.1              | 50         | 1.8                                              | 710                                                          | 165                                                               | 15               |
| Li <sub>2</sub> S/CMK-3  Si NW                                 | 0.12             | 20         | 1.4                                              | 630                                                          | 124                                                               | 16               |
| Li <sub>2</sub> S  SnO <sub>2</sub>                            | 0.5              | 200        | 2.4                                              | 442                                                          | 185                                                               | 17               |
| Li <sub>2</sub> S@NCNF  Fe <sub>3</sub> O <sub>4</sub> /CNs    | 0.2              | 50         | 1.6                                              | 675                                                          | 247                                                               | 18               |
| Li <sub>2</sub> S/graphene  Si-LP                              | 0.08             | 40         | 1.3                                              | 723                                                          | 187                                                               | 19               |
| Li <sub>2</sub> S@MXene/G  Fe <sub>3</sub> O <sub>4</sub> /CNs | 0.2              | 50         | 1.8                                              | 536                                                          | 217                                                               | 20               |
| Li <sub>2</sub> S-ZnS@NC  <br>Si-NP@HCF                        | 0.2              | 200        | 2.0                                              | 673                                                          | 256                                                               | 8                |
| Li <sub>2</sub> S-MCMB  Si-O-C                                 | 0.2              | 50         | 1.0                                              | 390                                                          | 118                                                               | 21               |
| <b><i>h</i>-CoN@MCNF/Li<sub>2</sub>S  <br/>Si-NP@MCNF</b>      | <b>0.2</b>       | <b>100</b> | <b>1.0-2.5</b>                                   | <b>802</b>                                                   | <b>506</b>                                                        | <b>This work</b> |

\* The weight of the electrode includes the mass of active materials, binder, conductive carbon, and metal current collectors.

\*\* The mass of metal current collectors (Cu or Al) is defined as 5 mg cm<sup>-2</sup>.

## Supplementary References

1. Kresse, G.; Furthmüller, J. *Phys. Rev. B* **54**, 11169 (1996).
2. Kresse, G.; Joubert, D. *Phys. Rev. B* **59**, 1758 (1999).
3. Perdew, J. P.; Burke, K.; Ernzerhof, M. *Phys. Rev. Lett.* **77**, 3865 (1999).
4. Grimme, S.; Antony, J.; Ehrlich, S.; Krieg, H. *J. Chem. Phys.* **132**, 154104 (2010).
5. Henkelman, G.; Uberuaga, B. P.; Jónsson, H. *J. Chem. Phys.* **113**, 9901(2000).
6. Wu, F. X. *et al.*; *Energy Environ. Sci.* **11**, 807-817 (2018).
7. Seh, Z. W. *et al.*; *Nat. Commun.* **5**, 5017 (2014).
8. Yu, M. L. *et al.*; *Adv. Funct. Mater.* **29**, 1905986 (2019).
9. Liang, X. *et al.*; *Chem. Commun.* **55**, 10088-10091 (2019).
10. Tan, G. q. *et al.*; *Nat. Energy* **2**, 17090 (2017).
11. Zhang, J. *et al.*; *Adv. Energy Mater.* **7**, 1602876 (2017).
12. Nan, C. *et al.*; *J. Am. Chem. Soc.* **136**, 4659-4663 (2014).
13. Hao, Z. *et al.*; *Small* **15**, e1902377 (2019).
14. Xing, Z. Y. *et al.*; *Adv. Mater.* **32**, 2002403 (2020).
15. Shen, Y. F. *et al.*; *ACS Energy Lett.* **4**, 1717-1724 (2019).
16. Yang, Y. *et al.*; *Nano Lett.* **10**, 1486-1491 (2010).
17. Liu, M. *et al.*; *Nano Energy* **40**, 240-247 (2017).
18. Yu, M. L. *et al.*; *Adv. Energy Mater.* **7**, 1700018 (2017).
19. Li, Z. *et al.*; *Electrochemistry* **84**, 887-890 (2016).
20. Wang, Z. Y. *et al.*; *J. Energy Chem.* **37**, 183-191 (2019).
21. Agostini, M. *et al.*; *ACS Appl. Mater. Interfaces* **6**, 10924-10928 (2014).
